# Supplementary material
Source: PubMed Central journal article supplement (PMC4007470)
Supplement: supp_M114.565473_jbc.M114.565473-1.pdf [file supp_M114.565473_jbc.M114.565473-1.pdf]

Protein sequence for Dicer 1 from UCSC Browser. Consensus Sumo binding sites (determined with SumoPlot) are shown in red. There are 128 lysines (K) in the Dicer protein.

GenBank: AAI50288.1

>gi|152012889|gb|AAI50288.1| Dicer 1, ribonuclease type III [Homo sapiens]

MKSPALQPLSMAGLQIMTPASSPMGPFGLPWQQEAIHDNIYTPRKYQVELLEAALDHNTIVCLNTGSGK  
TFIAVLLTKELSYQIRGDFSRNGKRTVFLVNSANQVAQQVSAVRTHSDLKVGEYSNLEVNASWTKERWNQ  
EFTKHQVLIMTCYVALNVLKNGYLSLSLDINLLVDFECHLAILDHPYREIMKLCENCPCSPRILGLTASIL  
NGKCDPEELEEKIQKLEKILKSNAETATDLVVLDRYTSQPCEIVVDCGPFTDRSGLYERLLMELEEALNF  
INDCNISVHSKERDSTLISKQILSDCRAVLVVLGPWCADKAVGMMVRELQKYIKHEQEELHRKFLLFTDT  
FLRKIHALCEEHFSASLDLKFVTPKVIKLEILRKYKPYERQQFESVEWYNNRNQDNYVSWSDSEDDDE  
DEEIEEKEKPETNFSPFTNILCGIIFVERRYTAVVLNRLIKEAGKQDPELAYISSNFITGHGIGKNQPR  
NKQMEAEFRKQEEVLRKFRAHETNLLIATSIVEEGVDIPKCNLVVRFDLPTHEYRSYVQSKGRARAPISNY  
IMLADTDKIKSFEEDLKTYKAIKILRNKCSKSVDTGETDIDPVMDDDDVFPYVLRPDDGGPRVTINTA  
IGHINRYCARLPSDPFTHLAPKCRTRLPDGTFFYSTLYLPINSPLRASIVGPPMSCVRLAERVVALICCE  
KLHKIGELDDHLMFVGKETVKYEELDLHDEEETSVPGRPGSTKRRQCYPKAIPCELRDSYPRPDQPCYL  
YVIGMVLTTPLPDELNFRRRKLYPPEDTTRCFGILTAKPIQIPHFPVYTRSGEVTISIELKKS GFMLSL  
QMLELITRLHQYIFSHILRLEKPALEFKPTDADSAYCVLPLNVVNDSSSTLDIDFKFMEDIEKSEARIGIP  
STKYTKETPFVFKLEDYQDAVIIPRYRNFDPHREYVADVYTDLTPLSKFSPPEYETFAEYKTKYNLDL  
TNLNQPLLDVDHTSSRLNLLTPRHLNQGKALPLSSAEKRKAKWESLQNKQILVPELCAIHPIPASLWRK  
AVCLPSILYRLHCLLTAEEELRAQTASDAGVGVRSPLADFRYPNLDFGWKKSIDSKSFISISNSSSAENDN  
YCKHSTIVPENAAHQGANRTSSLENHDQMVNCRITLSESPGKLHVEVSADLTAINGLSYNQNLANGSYD  
LANRDFCQGNQLNYYKQEI PVQPTTSYSIQNLYSYENQPQPSDECTLLSNKYLDGNANKSTSDGSPVMAV  
MPGTTDTIQVLKGRMDSEQSPSIGYSSRTLGNPGLILQALTLNASDGFNLERLEMLGDSFLKHAITY  
LFCTYPDAHEGRLSYMRSKKVSNCNLYRLGKKKGLPSRMVVSIFDPPVNWLPPGYVVNQDKSNTDKWEKD  
EMTKDCMLANGKLEDYEEDEDEEEESLMWRAPKEEADYEDDFLEYDQEHIRFIDNMLMGSGAFVKKISLS  
PFSTTDSAYEWKMPKSSSLGSMFSSDFEDFDYSSWDAMCYLDPSKAVEEDDFVVGFWNPSEENCVDTG  
KQISYDLHTEQCIADKSIADCVEALLGCYLTSCGERAAQLFLCSLGLKVLVPIKRTDREKALCPTRENF  
NSQQKNLSVSCAAASVASSRSSLKDEYGC LKIPPRCMFDHPDADKTLNHLISGFENFEKKINYRFKNK  
AYLLQAFTHASYHYNTITDCYQRLEFLGDAILDYLIKHLIEDPRQHSPGVLTDLRSALVNNTIFASLAV  
KYDYHKYFKAVSPELFHVIDDFVQFQLEKNEMQGMSELRRSEDEEKEEDIEVPKAMGDI FESLAGAIY  
MDSGMSLETVWQVYYPMRPLIEKFSANVPRSPVRELLEMEPETAKFSPAERTYDGKVRVTVEVVGKGF  
KGVGRSYRIAKSAAARRALRSLKANQPQVPNS

SumoPlot predictions for sumo sites
